# Supplementary material
Source: PubMed Central journal article supplement (PMC2700992)
Supplement: 0904165106_ST1_PDF.pdf [file 0904165106_ST1_PDF.pdf]

Table S1. Data collection statistics

| Data collection                         |                                        |                                        |                        |                        |                                        |                                        |                                        |                                        |
|-----------------------------------------|----------------------------------------|----------------------------------------|------------------------|------------------------|----------------------------------------|----------------------------------------|----------------------------------------|----------------------------------------|
|                                         | “As-purified”                          | Derivative (Os)                        |                        |                        | Derivative (Au)                        | DecylUQ                                | AurachinC                              | 6.5 keV                                |
| Space group                             | $P2_12_12_1$                           | $P2_12_12_1$                           |                        |                        | $P2_12_12_1$                           | $P2_12_12_1$                           | $P2_12_12_1$                           | $P2_12_12_1$                           |
| Unit cell dimension (Å)                 | a = 112.85<br>b = 154.92<br>c = 178.04 | a = 112.30<br>b = 155.86<br>c = 178.26 |                        |                        | a = 112.10<br>b = 154.30<br>c = 176.70 | a = 110.78<br>b = 154.01<br>c = 175.55 | a = 111.18<br>b = 154.23<br>c = 176.53 | a = 110.78<br>b = 154.01<br>c = 175.55 |
|                                         |                                        | Peak                                   | Inflection             | Remote                 | Peak                                   |                                        |                                        |                                        |
| Wavelength (Å)                          | 0.91984                                | 1.14000                                | 1.14050                | 1.13010                | 1.03864                                | 1.00150                                | 1.00148                                | 1.907445                               |
| Resolution (Å)                          | 50.0 - 2.3 (2.4 - 2.3)                 | 50.0 - 3.5 (3.6 - 3.5)                 | 50.0 - 3.5 (3.6 - 3.5) | 50.0 - 4.0 (4.1 - 4.0) | 50.0 - 4.2 (4.3 - 4.2)                 | 50.0 - 2.0 (2.1 - 2.0)                 | 50.0 - 2.9 (3.0 - 2.9)                 | 50.0 - 2.3 (2.4 - 2.3)                 |
| $R_{\text{merge}}$ (%)                  | 8.3 (34.4)                             | 12.3 (38.2)                            | 12.8 (42.4)            | 8.2 (19.2)             | 6.2 (8.9)                              | 10.5 (76.5)                            | 8.3 (39.6)                             | 12.4 (58.6)                            |
| $I / \sigma(I)$                         | 14.87 (3.44)                           | 12.69 (4.30)                           | 12.26 (3.96)           | 15.77 (8.41)           | 15.38 (12.38)                          | 13.17 (1.86)                           | 16.74 (4.05)                           | 9.97 (2.40)                            |
| Completeness (%)                        | 97.9 (87.9)                            | 98.9 (98.9)                            | 98.9 (99.1)            | 98.7 (99.2)            | 99.7 (99.9)                            | 96.2 (76.7)                            | 98.8 (95.7)                            | 91.1 (75.9)                            |
| Redundancy                              | 3.47 (2.47)                            | 3.36 (3.34)                            | 3.37 (3.42)            | 3.33 (3.42)            | 3.83 (3.87)                            | 4.74 (1.86)                            | 3.72 (3.41)                            | 2.54 (1.63)                            |
| Refinement                              |                                        |                                        |                        |                        |                                        |                                        |                                        |                                        |
| Resolution (Å)                          | 2.30                                   |                                        |                        |                        |                                        | 2.00                                   | 2.90                                   | 2.30                                   |
| Total reflections                       | 471,639                                |                                        |                        |                        |                                        | 921,962                                | 249,689                                | 596,959                                |
| $R_{\text{work}} / R_{\text{free}}$ (%) | 19.2 / 23.5                            |                                        |                        |                        |                                        | 20.0 / 23.7                            | 19.4 / 24.1                            | 20.3 / 24.7                            |
| RMSD                                    |                                        |                                        |                        |                        |                                        |                                        |                                        |                                        |
| bond length (Å)                         | 0.010                                  |                                        |                        |                        |                                        | 0.008                                  | 0.006                                  | 0.009                                  |
| bond angles (°)                         | 1.420                                  |                                        |                        |                        |                                        | 1.179                                  | 0.989                                  | 1.308                                  |
| Number of atoms                         |                                        |                                        |                        |                        |                                        |                                        |                                        |                                        |
| protein                                 | 20136                                  |                                        |                        |                        |                                        | 20029                                  | 20094                                  | 20029                                  |
| cofactor (FAD)                          | 318                                    |                                        |                        |                        |                                        | 318                                    | 318                                    | 318                                    |
| detergent (DDM)                         | 210                                    |                                        |                        |                        |                                        | 210                                    | 210                                    | 210                                    |
| water                                   | 571                                    |                                        |                        |                        |                                        | 1142                                   | 194                                    | 546                                    |
| ions ( $\text{SO}_4^{2-}$ )             | 120                                    |                                        |                        |                        |                                        | 120                                    | 120                                    | 120                                    |
| ligand                                  | -                                      |                                        |                        |                        |                                        | 138                                    | 168                                    | 138                                    |
| sulfur                                  | 54                                     |                                        |                        |                        |                                        | 50                                     | 59                                     | 50                                     |
| buffer (MES)                            | 72                                     |                                        |                        |                        |                                        | -                                      | -                                      | -                                      |

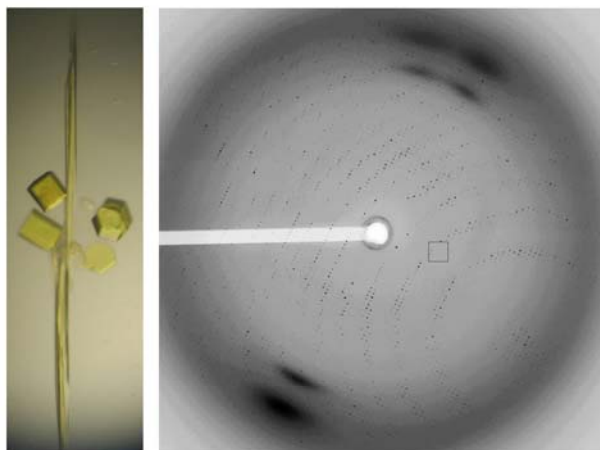

Five percent of the reflections were used for calculation of the  $R_{\text{free}}$ . Values in parenthesis are for the highest-resolution shell. In the *Inset* are one crystallization drop with the hexagonal and the needle crystal forms grown together and a typical diffraction pattern of the needle crystals used for solving the structure.
