# Supplementary material
Source: PubMed Central journal article supplement (PMC2700992)
Supplement: 0904165106_ST2_PDF.pdf [file 0904165106_ST2_PDF.pdf]

Table S2. Structural alignment of the SQR to the known structures deposited on the PDB performed with the server DALI ([www.ebi.ac.uk/dali](http://www.ebi.ac.uk/dali))

| Target | rmsd, Å | No. of aligned residues | Identity, % |
|--------|---------|-------------------------|-------------|
| 1fcd_A | 2.4     | 362                     | 21          |
| 2yvf_A | 2.8     | 321                     | 18          |
| 2gmh_A | 3.1     | 143                     | 17          |
| 1dx1_C | 3.1     | 329                     | 14          |
| 1nda_B | 3.2     | 325                     | 16          |
| 2qcu_B | 3.2     | 148                     | 15          |
| 4gr1   | 3.2     | 328                     | 15          |
| 1zk7_A | 3.3     | 322                     | 14          |
| 2cfy_F | 3.4     | 327                     | 15          |
| 1qla_A | 4.5     | 190                     | 13          |

Root-mean-square deviations are indicated in ångströms; identities indicate the percentage of structurally aligned residues that are identical in the SQR and in the respective aligned partner. PDB codes correspond to the following: 1fcd, flavocytochrome *c*:sulfide dehydrogenase; 2yvf, ferredoxin reductase; 2gmh, electron transfer flavoprotein (ETF):ubiquinone reductase; 1dx1, dihydrolipoamide dehydrogenase; 1nda, trypanothione oxidoreductase; 2qcu, glycerol-3-phosphate dehydrogenase; 4gr1, glutathione reductase; 1zk7, mercuric reductase; 2cfy, thioredoxin reductase; 1qla (2bs2), quinol:fumarate reductase.
